# Supplementary material
Source: publisher site journal article supplement (https://www.dovepress.com/article/443102)
Supplement: Supplementary file 1 [file get_supplementary_file.php]

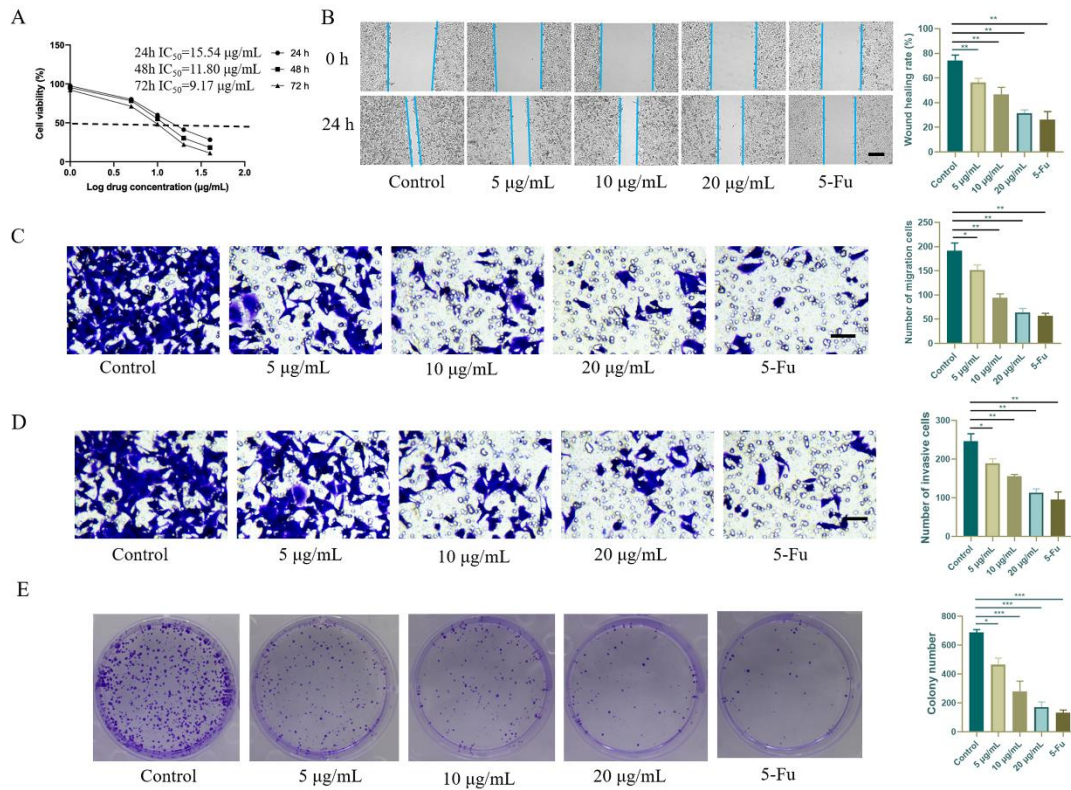

Supplementary figure 1. **Effects of *Salvia miltiorrhiza* on the proliferation, invasion, and migration of human DLD-1 colorectal cancer cells.** DLD-1 colorectal cancer cells were treatment with *Salvia miltiorrhiza* at different concentrations or 5-Fu at 20  $\mu\text{M}$ . Subsequently, we conducted various assessments, including cell proliferation, viability, migration, invasion, and colony formation, following the methods outlined in the materials and methods section. A. Cell viability was measured by the CCK-8 assay. B. Cell proliferation was detected by the scratch experiment. Original magnification: 10 $\times$ . C. Cell migration was determined by the transwell assay. Original magnification: 40 $\times$ . D. Cell invasion was detected by the transwell experiment. Original magnification: 40 $\times$ . E. Cell colony formation. The data presented here are the combined results of three separate experiments. Scale bar: 50  $\mu\text{m}$ . \* $p < 0.05$ , \*\* $p < 0.01$ , \*\*\* $p < 0.001$  vs. Control.

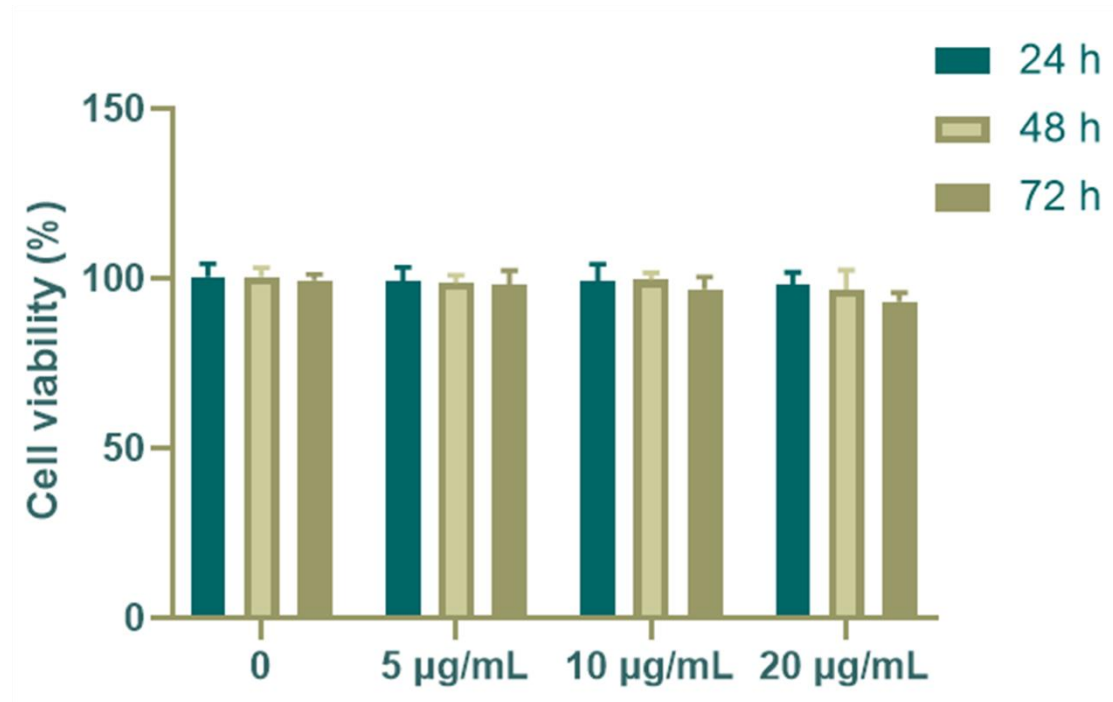

Supplementary figure 2. CCK8 assay of the viability of NCM-460 cells treated with *Salvia miltiorrhiza* at 5 µg/mL, 10 µg/mL, and 20 µg/mL for 24 h, 48 h and 72 h respectively.

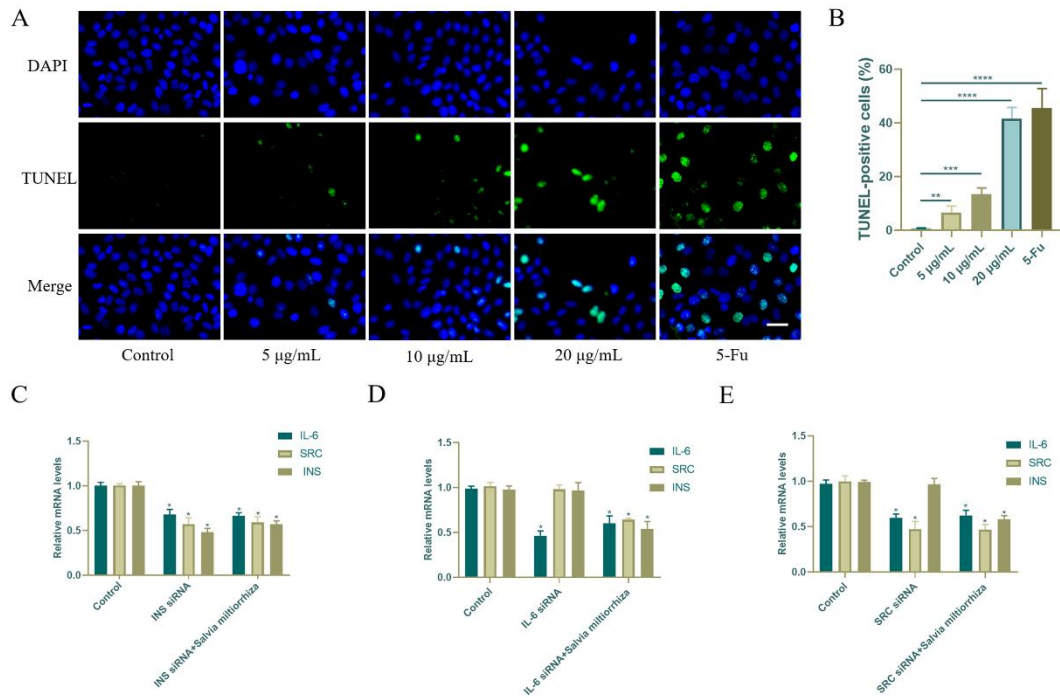

Supplementary figure 3. **Effects of *Salvia miltiorrhiza* on the apoptosis of human DLD-1 colorectal cancer cells.** DLD-1 colorectal cancer cells were treated with *Salvia miltiorrhiza* at 5µg/mL, 10 µg/mL and 20 µg/mL, or 5-Fu at 20 µM, followed by the analyses of TUNEL and qRT-PCR. A-B. TUNEL analysis of the apoptosis of DLD-1 cells treated with *Salvia miltiorrhiza* or 5-Fu. Original magnification: 40×. C-E. The real-time qRT-PCR analysis of the mRNA levels of SRC, IL-6, and INS in DLD-1 cells treated with *Salvia miltiorrhiza* or 5-Fu. Scale bar: 50 µm. \* $p < 0.05$ , \*\* $p < 0.01$ , \*\*\* $p < 0.001$ , \*\*\*\* $p < 0.0001$  vs. Control.
